# Supplementary material
Source: PubMed Central journal article supplement (PMC525468)

**A** Bub3-GFP and Bub3-Myc are functional

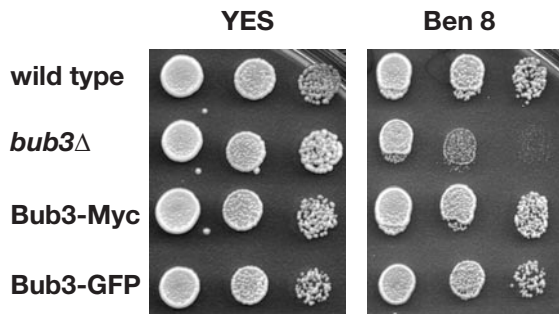

**B** *rae1-167* is ts, but not benomyl sensitive

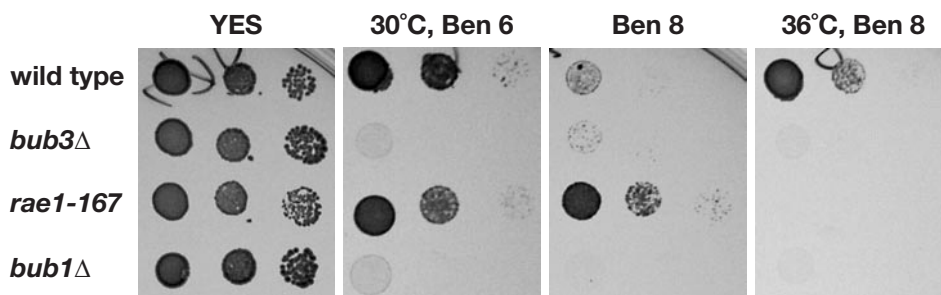

**C** Overexpression of Rae1 does not rescue the TBZ sensitivity of *bub3*Δ

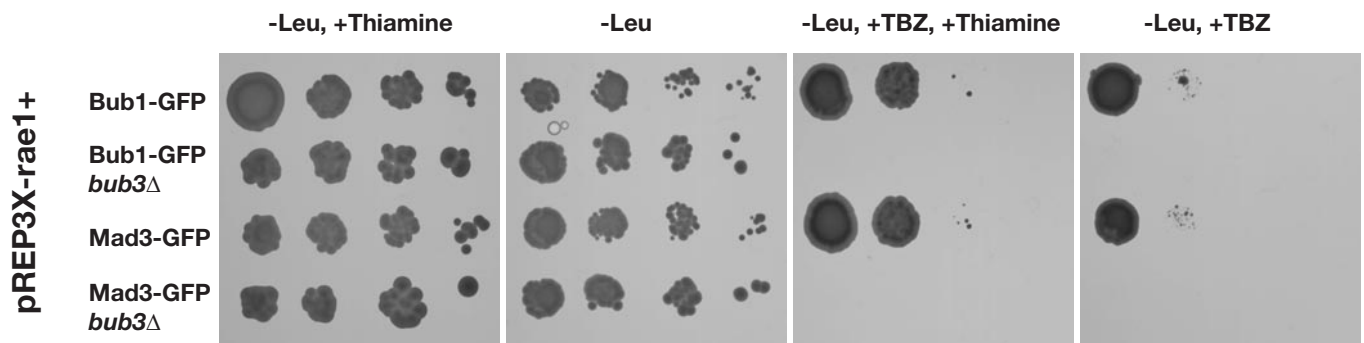

**A.**

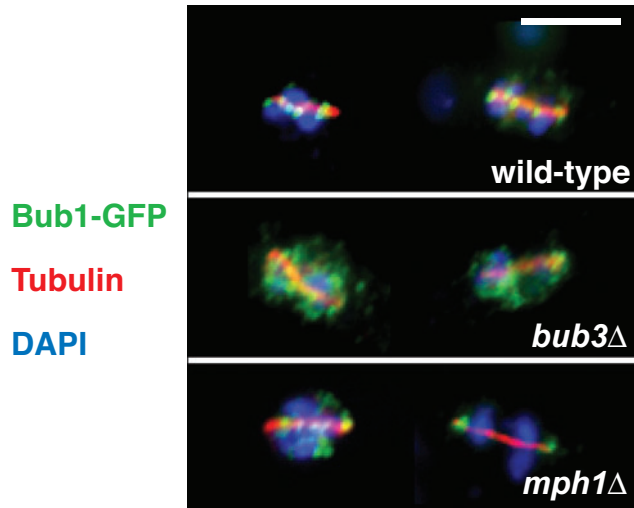

**B.**

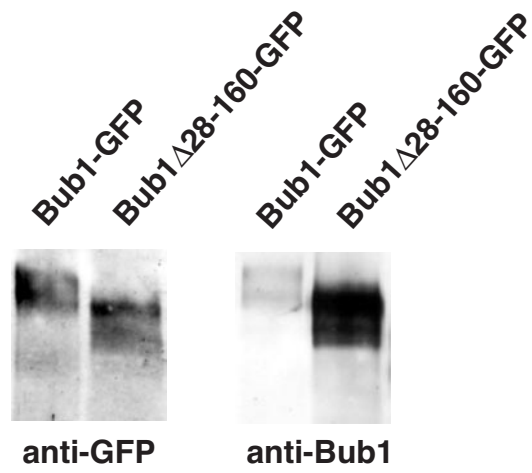

**C.**

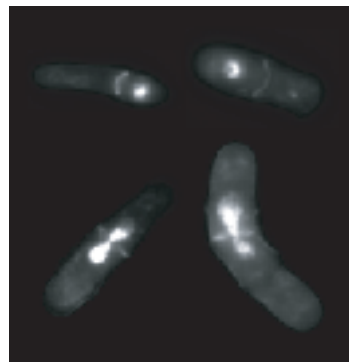

*nda3, bub1* $\Delta$ 28-160

**Suppl. Figure 2**

**A**

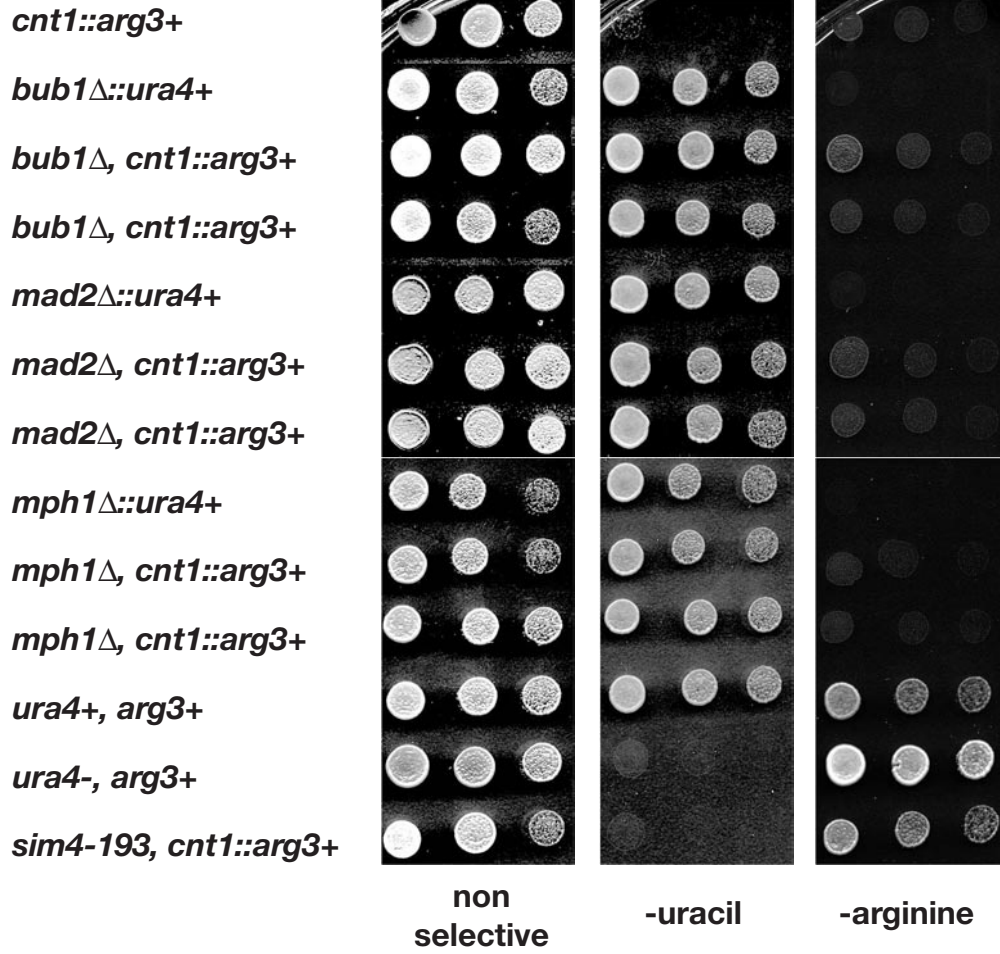

**B**

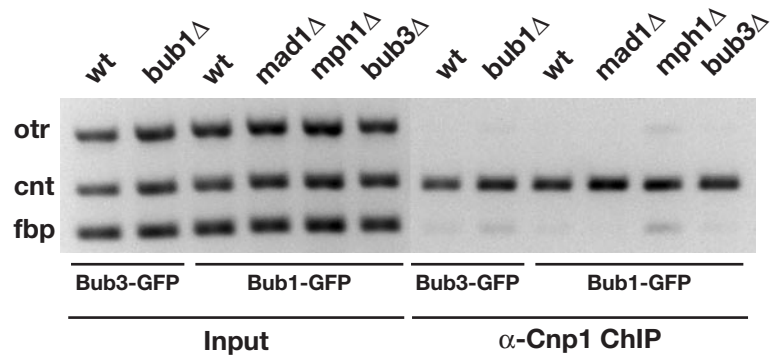

Supplement: molcellb_24_22_9786__1.pdf [file molcellb_24_22_9786__1.pdf]
